# Supplementary material for: Effects of Targeted Memory Reactivation on Cortical Networks
Source: MDPI journal article supplement (doi:10.3390/brainsci14020114), 2024-01-23
Supplement: s1 [file s1]

## Supplementary Materials S1: Hemispheres- Frontal connectivity

Table S1 Repeated measures Anova with Session as repeated factors and Hand as between factors for the three windows of interest ( $w1$ ,  $w2$  and  $w3$ ) and the two-connectivity metrics, PLV (left) and wPLI (right) for the right hemisphere-frontal connectivity. Statistically significant values are shadowed in grey with the respective  $p$  values in bold.

| RHem - Frontal   | PLV                                                                                          |                                                                                              |                                                                                              | wPLI                                                                                    |                                                                                           |                                                                                          |
|------------------|----------------------------------------------------------------------------------------------|----------------------------------------------------------------------------------------------|----------------------------------------------------------------------------------------------|-----------------------------------------------------------------------------------------|-------------------------------------------------------------------------------------------|------------------------------------------------------------------------------------------|
|                  | $w1$                                                                                         | $w2$                                                                                         | $w3$                                                                                         | $w1$                                                                                    | $w2$                                                                                      | $w3$                                                                                     |
| Session          | F=8.8, <b>p&lt;0.001</b><br>BF <sub>10</sub> = <b>697.17</b> ,<br>BF <sub>incl</sub> =482.10 | F=8.2, <b>p&lt;0.001</b><br>BF <sub>10</sub> = <b>304.78</b> ,<br>BF <sub>incl</sub> =482.10 | F=8.2, <b>p&lt;0.001</b><br>BF <sub>10</sub> = <b>637.80</b> ,<br>BF <sub>incl</sub> =439.63 | F=4.49, <b>p=0.015</b><br>BF <sub>10</sub> = <b>6.020</b> ,<br>BF <sub>incl</sub> =4.13 | F=5.29, <b>p=0.008</b><br>BF <sub>10</sub> = <b>11.562</b> ,<br>BF <sub>incl</sub> =8.136 | F=4.30, <b>p=0.018</b><br>BF <sub>10</sub> = <b>3.910</b> ,<br>BF <sub>incl</sub> =2.755 |
| Hand             | F=0.02,p=0.87<br>BF <sub>10</sub> =0.248,<br>BF <sub>incl</sub> =0.196                       | F=0.02,p=0.97<br>BF <sub>10</sub> =0.279,<br>BF <sub>incl</sub> =0.198                       | F=0.00, p=0.99<br>BF <sub>10</sub> =0.249<br>BF <sub>incl</sub> =0.194                       | F=0.05,p=0.816<br>BF <sub>10</sub> =0.277,<br>BF <sub>incl</sub> =0.206                 | F=0.31,p=0.584<br>BF <sub>10</sub> =0.281,<br>BF <sub>incl</sub> =0.231                   | F=0.402,p=0.67<br>BF <sub>10</sub> =0.317,<br>BF <sub>incl</sub> =0.251                  |
| Session<br>*Hand | F=0.04,p=0.96<br>BF <sub>10</sub> =177.70,<br>BF <sub>incl</sub> =0.127                      | F=0.02,p=0.98<br>BF <sub>10</sub> =78.56,<br>BF <sub>incl</sub> =0.128                       | F=0.01, p=0.992<br>BF <sub>10</sub> =160.69<br>BF <sub>incl</sub> =0.127                     | F=0.14,p=0.868<br>BF <sub>10</sub> =1.612,<br>BF <sub>incl</sub> =0.127                 | F=0.40,p=0.671<br>BF <sub>10</sub> =3.340,<br>BF <sub>incl</sub> =0.181                   | F=4.02,p=0.529<br>BF <sub>10</sub> =1.246,<br>BF <sub>incl</sub> =0.178                  |

Table S2 Repeated measures Anova with Session as repeated factors and Hand as between factors for the three windows of interest ( $w1$ ,  $w2$  and  $w3$ ) and the two-connectivity metrics, PLV (left) and wPLI (right) for the right hemisphere-frontal connectivity. Statistically significant values are shadowed in grey with the respective  $p$  values in bold.

| LHem-<br>Frontal  | PLV                                                                                                 |                                                                                                |                                                                                                 | wPLI                                                                                   |                                                                                |                                                                                         |
|-------------------|-----------------------------------------------------------------------------------------------------|------------------------------------------------------------------------------------------------|-------------------------------------------------------------------------------------------------|----------------------------------------------------------------------------------------|--------------------------------------------------------------------------------|-----------------------------------------------------------------------------------------|
|                   | $w1$                                                                                                | $w2$                                                                                           | $w3$                                                                                            | $w1$                                                                                   | $w2$                                                                           | $w3$                                                                                    |
| Session           | F=16.8, <b>p&lt;0.001</b><br>BF <sub>10</sub> = <b>285202.44</b> ,<br>BF <sub>incl</sub> =197355.38 | F=15.1, <b>p&lt;0.001</b><br>BF <sub>10</sub> = <b>66300.06</b><br>BF <sub>incl</sub> =45682.4 | F=16.5, <b>p&lt;0.001</b><br>BF <sub>10</sub> = <b>188967.1</b><br>BF <sub>incl</sub> =131181.0 | F=3.38, <b>p=0.040</b><br>BF <sub>10</sub> = <b>1.85</b> ,<br>BF <sub>incl</sub> =1.13 | F=2.43, <b>p=0.096</b><br>BF <sub>10</sub> =0.868<br>BF <sub>incl</sub> =0.605 | F=3.21, <b>p=0.047</b><br>BF <sub>10</sub> = <b>2.12</b> ,<br>BF <sub>incl</sub> =1.486 |
| Hand              | F=0.001,p=0.97<br>BF <sub>10</sub> =0.250,<br>BF <sub>incl</sub> =0.198                             | F=0.016,p=0.90<br>BF <sub>10</sub> =0.256, BF <sub>incl</sub> =0.199                           | F=0.06,p=0.79<br>BF <sub>10</sub> =0.252 BF <sub>incl</sub> =0.203                              | F=0.05,p=0.825<br>BF <sub>10</sub> =0.296<br>BF <sub>incl</sub> =0.243                 | F=0.00,p=0.930<br>BF <sub>10</sub> =0.279<br>BF <sub>incl</sub> =0.204         | F=0.06,p=0.803<br>BF <sub>10</sub> =0.262<br>BF <sub>incl</sub> =0.208                  |
| Ses-<br>sion*Hand | F=0.010,p=0.99<br>BF <sub>10</sub> =73413.86,<br>BF <sub>incl</sub> =0.127                          | F=0.013,p=0.99<br>BF <sub>10</sub> =16894.79,<br>BF <sub>incl</sub> =0.137                     | F=0.01,p=0.99<br>BF <sub>10</sub> =49308.56<br>BF <sub>incl</sub> =0.137                        | F=1.09,p=0.342<br>BF <sub>10</sub> =0.468<br>BF <sub>incl</sub> =0.195                 | F=0.42,p=0.658<br>BF <sub>10</sub> =0.240<br>BF <sub>incl</sub> =0.087         | F=0.67,p=0.514<br>BF <sub>10</sub> =0.551<br>BF <sub>incl</sub> =0.164                  |

Table S3 Post-hoc analysis for Session from the right hand-frontal connections. Statistically significant values are shadowed in grey with the respective  $p$  values in bold and  $p$ -values less than 0.10 are only highlighted in bold. C=Cohens'd value.

| RHem -<br>Frontal | PLV                                                  |                                                        |                                                       | wPLI                                                                 |                                                                       |                                                                        |
|-------------------|------------------------------------------------------|--------------------------------------------------------|-------------------------------------------------------|----------------------------------------------------------------------|-----------------------------------------------------------------------|------------------------------------------------------------------------|
|                   | $w1$                                                 | $w2$                                                   | $w3$                                                  | $w1$                                                                 | $w2$                                                                  | $w3$                                                                   |
| Pre-Sleep         | t=-0.48, p=0.64<br>C=-0.08<br>BF <sub>10</sub> =0.21 | t=-0.52, p=0.621<br>C=-0.09<br>BF <sub>10</sub> =0.214 | t=-0.65, p=0.52<br>C=-0.12<br>BF <sub>10</sub> =0.230 | t=-2.05, <b>p=0.09</b><br>C=-0.36<br>BF <sub>10</sub> = <b>1.193</b> | t=-2.98, <b>p=0.013</b><br>C= -0.58<br>BF <sub>10</sub> = <b>7.35</b> | t=-2.54, <b>p=0.032</b><br>C= -0.45<br>BF <sub>10</sub> = <b>2.954</b> |
| Pre-Post          | t=3.07, <b>p=0.009</b><br>C=0.543                    | t=2.88, <b>p=0.014</b><br>C=0.51                       | t=2.98, <b>p=0.011</b><br>C=0.53                      | t=0.41, p=0.68<br>C=0.07                                             | t=-0.16, p=0.87<br>C= -0.03                                           | t=0.49, p=0.62<br>C=0.09                                               |

|            |                                                                      |                                                                      |                                                                      |                                                                 |                                                                  |                                                                  |
|------------|----------------------------------------------------------------------|----------------------------------------------------------------------|----------------------------------------------------------------------|-----------------------------------------------------------------|------------------------------------------------------------------|------------------------------------------------------------------|
|            | BF <sub>10</sub> =8.887                                              | BF <sub>10</sub> =5.890                                              | BF <sub>10</sub> =7.35                                               | BF <sub>10</sub> =0.204                                         | BF <sub>10</sub> =0.191                                          | BF <sub>10</sub> =0.212                                          |
| Sleep-Post | t=4.43, <b>p&lt;0.001</b><br>C=0.78<br><b>BF<sub>10</sub>=236.56</b> | t=4.27, <b>p&lt;0.001</b><br>C=0.75<br><b>BF<sub>10</sub>=157.95</b> | t=4.40, <b>p&lt;0.001</b><br>C=0.78<br><b>BF<sub>10</sub>=220.77</b> | t=3.53, <b>p=0.04</b><br>C=0.62<br><b>BF<sub>10</sub>=25.27</b> | t=3.09, <b>p=0.013</b><br>C=0.546<br><b>BF<sub>10</sub>=9.27</b> | t=2.77, <b>p=0.028</b><br>C=0.49<br><b>BF<sub>10</sub>=4.701</b> |

Table S4 Post-hoc analysis for Session from the left hand-frontal connections. Statistically significant values are shadowed in grey with the respective *p* values in bold. *p*-values less than 0.10 are highlighted in bold.

| LHem<br>Frontal | PLV                                                                     |                                                                         |                                                                         | wPLI                                                                |                                                        |                                                               |
|-----------------|-------------------------------------------------------------------------|-------------------------------------------------------------------------|-------------------------------------------------------------------------|---------------------------------------------------------------------|--------------------------------------------------------|---------------------------------------------------------------|
|                 | w1                                                                      | w2                                                                      | w3                                                                      | w1                                                                  | w2                                                     | w3                                                            |
| Pre-Sleep       | t=-4.44, <b>p&lt;0.001</b><br>C= -0.78<br><b>BF<sub>10</sub>=240.94</b> | t=-4.44, <b>p&lt;0.001</b><br>C= -0.78<br><b>BF<sub>10</sub>=242.97</b> | t=-4.69, <b>p&lt;0.001</b><br>C= -0.83<br><b>BF<sub>10</sub>=471.61</b> | t=-2.39, <b>p=0.069</b><br>C= -0.43<br><b>BF<sub>10</sub>=2.202</b> | t=-1.82,p=0.234<br>C=-0.31<br>BF <sub>10</sub> =0.824  | t=-2.10, <b>p=0.088</b><br>C=-0.37<br>BF <sub>10</sub> =1.294 |
| Pre-Post        | t=1.22, p=0.232<br>C=0.21<br>BF <sub>10</sub> =0.371                    | t=1.02, p=0.317<br>C=0.18<br>BF <sub>10</sub> =0.303                    | t=1.06, p=0.299<br>C=0.18<br>BF <sub>10</sub> =0.315                    | t=0.16, p=0.869<br>C=0.029<br>BF <sub>10</sub> =0.191               | t=-1.78, p=0.234<br>C=-0.31<br>BF <sub>10</sub> =0.772 | t=0.39, p=0.699<br>C=0.029<br>BF <sub>10</sub> =0.203         |
| Sleep-Post      | t=6.23, <b>p&lt;0.001</b><br>C=1.10<br><b>BF<sub>10</sub>=26781.00</b>  | t=5.99, <b>p&lt;0.001</b><br>C=1.05<br><b>BF<sub>10</sub>=13344.29</b>  | t=6.08, <b>p&lt;0.001</b><br>C=1.07<br><b>BF<sub>10</sub>=17817.57</b>  | t=2.13, <b>p=0.082</b><br>C=0.37<br>BF <sub>10</sub> =1.363         | t=0.08, p=0.939<br>C=0.01<br>BF <sub>10</sub> =0.189   | t=2.31, <b>p=0.082</b><br>C=0.41<br>BF <sub>10</sub> =1.899   |

Table S5 Paired t-test for Hand (Right versus Left) for PLV (top row) and wPLI (bottom row) connectivity metrics. Statistically significant values are shadowed in grey with the respective p values in bold. p-values less than 0.10 are highlighted in bold.

| LHem - F | PLV       |    |       |             |                  |
|----------|-----------|----|-------|-------------|------------------|
|          | Statistic | df | p     | Effect size | BF <sub>10</sub> |
| Pre w1   | -0.436    | 15 | 0.669 | -0.109      | 0.27             |
| Sleep w1 | 0.013     | 15 | 0.990 | 0.003       | 0.25             |
| Post w1  | 0.974     | 15 | 0.345 | 0.244       | 0.38             |
| Pre w2   | -1.200    | 15 | 0.249 | -0.300      | 0.47             |
| Sleep w2 | -0.316    | 15 | 0.756 | -0.079      | 0.26             |
| Post w2  | 0.275     | 15 | 0.787 | 0.069       | 0.26             |
| Pre w3   | -1.43     | 15 | 0.174 | -0.357      | 0.600            |
| Sleep w3 | -0.775    | 15 | 0.450 | -0.194      | 0.332            |
| Post w3  | -0.617    | 15 | 0.547 | -0.154      | 0.302            |

| RHem - F | PLV       |    |              |             |                  |
|----------|-----------|----|--------------|-------------|------------------|
|          | Statistic | df | p            | Effect size | BF <sub>10</sub> |
| Pre w1   | 1.248     | 15 | 0.231        | 0.312       | 0.49             |
| Sleep w1 | -1.681    | 15 | 0.113        | -0.420      | 0.81             |
| Post w1  | 1.772     | 15 | <b>0.097</b> | 0.443       | 0.91             |
| Pre w2   | 82.00     | 15 | 0.495        | 0.206       | 0.48             |
| Sleep w2 | -0.784    | 15 | 0.445        | -0.206      | 0.33             |
| Post w2  | -0.049    | 15 | 0.961        | -0.012      | 0.25             |
| Pre w3   | 0.689     | 15 | 0.501        | 0.172       | 0.315            |
| Sleep w3 | -1.054    | 15 | 0.309        | -0.264      | 0.412            |
| Post w3  | 0.121     | 15 | 0.906        | 0.030       | 0.257            |

| LHem - F | wPLI      |    |       |             |                  |
|----------|-----------|----|-------|-------------|------------------|
|          | Statistic | df | p     | Effect size | BF <sub>10</sub> |
| Pre w1   | 0.253     | 15 | 0.804 | 0.063       | 0.486            |
| Sleep w1 | -0.295    | 15 | 0.772 | -0.074      | 0.257            |
| Post w1  | 0.530     | 15 | 0.604 | 0.133       | 0.258            |
| Pre w2   | 0.964     | 15 | 0.350 | 0.241       | 0.290            |
| Sleep w2 | -0.250    | 15 | 0.806 | -0.062      | 0.330            |
| Post w2  | 0.219     | 15 | 0.830 | 0.055       | 0.363            |
| Pre w3   | -1.326    | 15 | 0.205 | -0.331      | 0.314            |
| Sleep w3 | -0.577    | 15 | 0.573 | -0.144      | 0.390            |
| Post w3  | 0.168     | 15 | 0.869 | 0.042       | 0.398            |

| RHem - F | wPLI      |    |       |             |                  |
|----------|-----------|----|-------|-------------|------------------|
|          | Statistic | df | p     | Effect size | BF <sub>10</sub> |
| Pre w1   | -1.229    | 15 | 0.238 | -0.307      | 0.263            |
| Sleep w1 | -0.538    | 15 | 0.598 | -0.135      | 0.382            |
| Post w1  | 0.686     | 15 | 0.503 | 0.172       | 0.536            |
| Pre w2   | 0.103     | 15 | 0.919 | 0.026       | 0.264            |
| Sleep w2 | 0.764     | 15 | 0.457 | 0.191       | 0.263            |
| Post w2  | -0.991    | 15 | 0.337 | 0.191       | 0.296            |
| Pre w3   | -0.149    | 15 | 0.869 | 0.042       | 0.289            |
| Sleep w3 | 0.899     | 15 | 0.383 | 0.225       | 0.261            |
| Post w3  | -1.015    | 15 | 0.326 | -0.254      | 0.259            |

Wilcoxon signed-rank test is used when normality (Shapiro-Wilk test) assumption is violated. In this case effect size is given by the matched rank bi-serial correlation. Otherwise, Student t-test and Cohen's d for measure effect size are used.

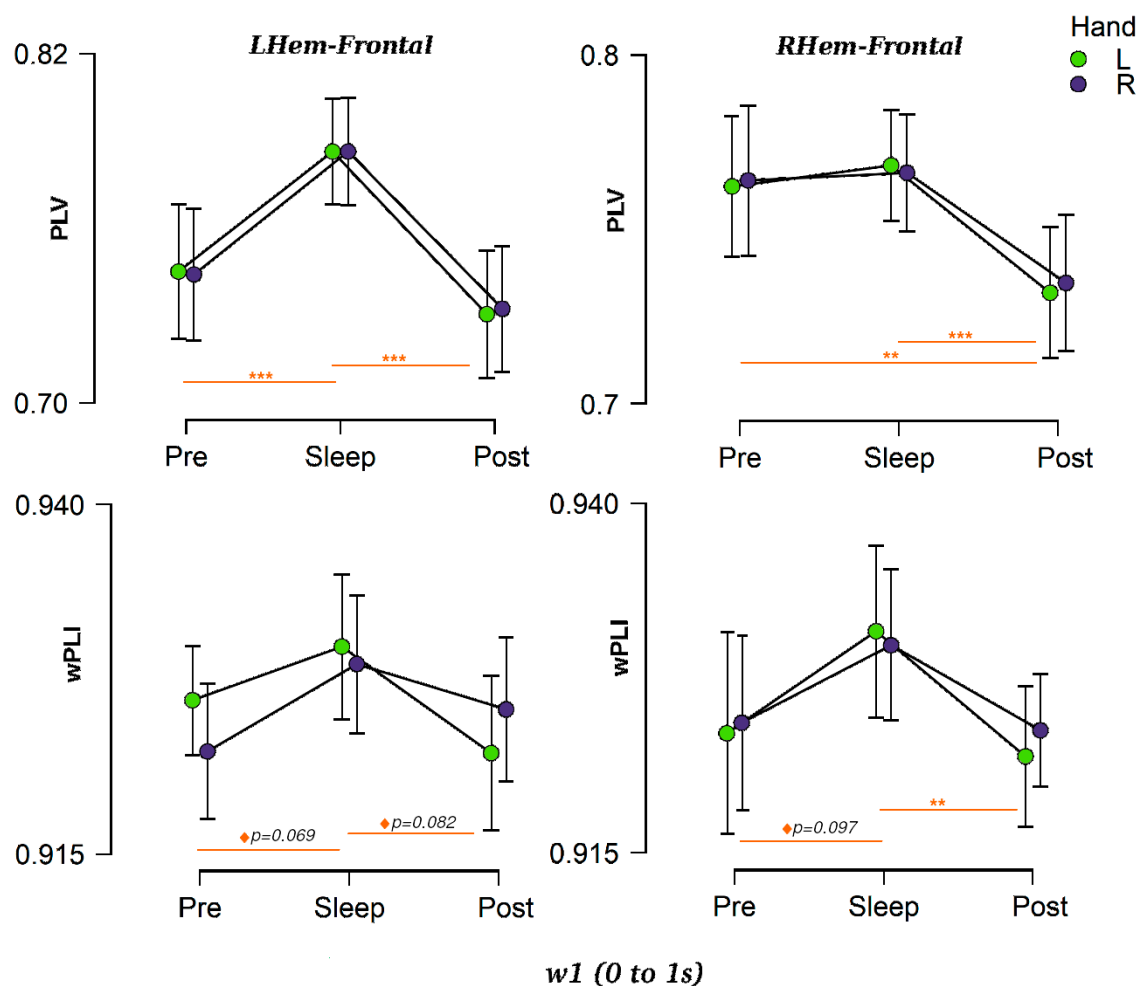

Figure S1. Hemisphere to frontal connectivity for w1 in each session (Pre, Sleep and Post sleep) for PLV (up) and wPLI (down), left hemisphere-frontal (LHem-F) on the first column and right hemisphere - frontal (RHem-F) in the second column. Purple indicates the connectivity for R hand trials and green dots for L hand trials. Horizontal bars represent 95% confident intervals and those sessions statistically significant are indicated by \*\*\* for  $p < 0.001$ , \*\*  $p < 0.01$ , \* for  $p < 0.05$  and °  $p < 0.10$ .

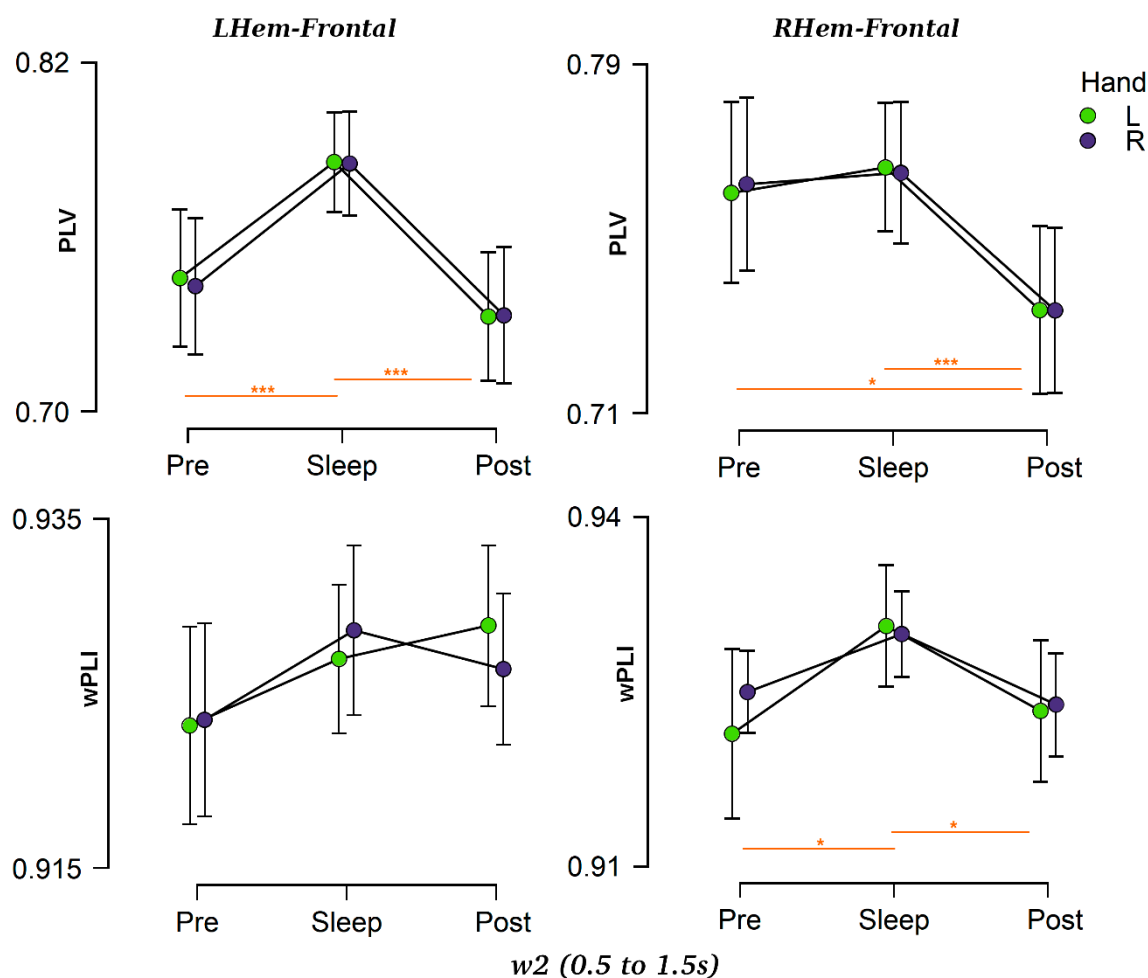

Figure S2. Hemisphere to frontal connectivity for  $w2$  in each session (Pre, Sleep and Post sleep) for PLV (up) and wPLI (down), left hemisphere -frontal (LHem-F) on the first column and right hemisphere -frontal (RHem-F) in the second column. Purple dots indicate the connectivity for R hand trials and green dots for L hand trials. Horizontal bars represent 95% confident intervals and those sessions statistically significant are indicated by \*\*\* for  $p<0.001$ , \*\*  $p<0.01$ , \* for  $p<0.05$  and °  $p<0.10$ .

### Supplementary Materials S2: between hemispheres connectivity

Table S6 RM-Anova results for between hemispheres connectivity (RHem-LHem), PLV (left) and wPLI (right) for each window of interest ( $w1$  to  $w3$ ).

| RHem - LHem | PLV                                                                           |                                                                                |                                                                               | wPLI                                                                     |                                                                          |                                                                              |
|-------------|-------------------------------------------------------------------------------|--------------------------------------------------------------------------------|-------------------------------------------------------------------------------|--------------------------------------------------------------------------|--------------------------------------------------------------------------|------------------------------------------------------------------------------|
|             | $w1$                                                                          | $w2$                                                                           | $w3$                                                                          | $w1$                                                                     | $w2$                                                                     | $w3$                                                                         |
| Session     | F=33.0, $p<0.001$<br>BF <sub>10</sub> =4.33E10<br>BF <sub>incl</sub> =2.98E10 | F=34.38, $p<0.001$<br>BF <sub>10</sub> =1.15E11<br>BF <sub>incl</sub> =8.31E10 | F=35.3, $p<0.001$<br>BF <sub>10</sub> =1.87E11<br>BF <sub>incl</sub> =1.30E11 | F=0.73, $p=0.48$<br>BF <sub>10</sub> =0.180<br>BF <sub>incl</sub> =0.128 | F=0.09, $p=0.91$<br>BF <sub>10</sub> =0.105<br>BF <sub>incl</sub> =0.074 | F=8.92, $p<0.001$<br>BF <sub>10</sub> =186.766<br>BF <sub>incl</sub> =137.87 |
| Hand        | F=0.02, $p=0.88$<br>BF <sub>10</sub> =0.257<br>BF <sub>incl</sub> =0.199      | F=0.01, $p=0.906$<br>BF <sub>10</sub> =0.258<br>BF <sub>incl</sub> =0.243      | F=0.08, $p=0.77$<br>BF <sub>10</sub> =0.253<br>BF <sub>incl</sub> =0.207      | F=0.25, $p=0.62$<br>BF <sub>10</sub> =0.295<br>BF <sub>incl</sub> =0.206 | F=0.32, $p=0.58$<br>BF <sub>10</sub> =0.297<br>BF <sub>incl</sub> =0.202 | F=0.24, $p=0.625$<br>BF <sub>10</sub> =0.283<br>BF <sub>incl</sub> =0.280    |

|              |                                                                          |                                                                           |                                                                           |                                                                       |                                                                       |                                                                         |
|--------------|--------------------------------------------------------------------------|---------------------------------------------------------------------------|---------------------------------------------------------------------------|-----------------------------------------------------------------------|-----------------------------------------------------------------------|-------------------------------------------------------------------------|
| Session*Hand | F=0.00, p=0.98<br>BF <sub>10</sub> =1.11E10<br>BF <sub>incl</sub> =0.130 | F=0.002, p=0.98<br>BF <sub>10</sub> =3.78E10<br>BF <sub>incl</sub> =0.105 | F=0.01, p=0.98<br>BF <sub>10</sub> =05.40E10<br>BF <sub>incl</sub> =0.128 | F=0.76,p=0.47<br>BF <sub>10</sub> =0.054<br>BF <sub>incl</sub> =0.041 | F=0.66,p=0.52<br>BF <sub>10</sub> =0.031<br>BF <sub>incl</sub> =0.023 | F=1.35,p=0.265<br>BF <sub>10</sub> =53.262<br>BF <sub>incl</sub> =0.418 |
|--------------|--------------------------------------------------------------------------|---------------------------------------------------------------------------|---------------------------------------------------------------------------|-----------------------------------------------------------------------|-----------------------------------------------------------------------|-------------------------------------------------------------------------|

Table S7. Post-hoc analysis for Session. Statistically significant values are shadowed in grey with the respective *p* values in bold and *p*-values less than 0.10 are highlighted in bold.

| RHem - LHem | PLV                                                                   |                                                                        |                                                                       | wPLI                                                   |                                                     |                                                                     |
|-------------|-----------------------------------------------------------------------|------------------------------------------------------------------------|-----------------------------------------------------------------------|--------------------------------------------------------|-----------------------------------------------------|---------------------------------------------------------------------|
|             | w1                                                                    | w2                                                                     | w3                                                                    | w1                                                     | w2                                                  | w3                                                                  |
| Pre-Sleep   | t=-3.42, <b>p=0.002</b><br>C=-0.60<br><b>BF<sub>10</sub>=19.52</b>    | t=-3.46, <b>p=0.002</b><br>C=-0.61<br><b>BF<sub>10</sub>=21.37</b>     | t=-3.51, <b>p=0.001</b><br>C=-0.62<br><b>BF<sub>10</sub>=24.72</b>    | t=-0.75, p=0.92<br>C= -0.13<br>BF <sub>10</sub> =0.245 | t=-0.37, p=1<br>C= -0.13<br>BF <sub>10</sub> =0.201 | t=-2.89, <b>p=0.014</b><br>C= -0.51<br><b>BF<sub>10</sub>=5.965</b> |
| Pre-Post    | t=3.73, <b>p=0.002</b><br>C=0.66<br><b>BF<sub>10</sub>=41.45</b>      | t=3.84, <b>p=0.001</b><br>C=0.67<br><b>BF<sub>10</sub>=54.21</b>       | t=3.85, <b>p=0.001</b><br>C=0.68<br><b>BF<sub>10</sub>=55.03</b>      | t=0.52, p=0.92<br>C= -0.09<br>BF <sub>10</sub> =0.214  | t=-0.33, p=1<br>C= -0.06<br>BF <sub>10</sub> =0.199 | t=1.76, <b>p=0.087</b><br>C= 0.31<br>BF <sub>10</sub> =0.754        |
| Sleep-Post  | t=14.0, <b>p&lt;0.001</b><br>C=2.48<br><b>BF<sub>10</sub>=1.19E12</b> | t=14.1, <b>p&lt;0.001</b><br>C=-2.50<br><b>BF<sub>10</sub>=1.50E12</b> | t=14.9, <b>p&lt;0.001</b><br>C=-2.66<br><b>BF<sub>10</sub>=5.4E12</b> | t=1.10, p=0.841<br>C=0.19<br>BF <sub>10</sub> =0.328   | t=1.12, p=1<br>C= 0.22<br>BF <sub>10</sub> =0.190   | t=3.76, <b>p=0.002</b><br>C= 0.66<br><b>BF<sub>10</sub>=543.793</b> |

Table S8 Paired *t*-test for Hand (Right versus Left) in wPLI connectivity. Statistically significant values are shadowed in grey with the respective *p* values in bold.

| RHem - LHem | wPLI      |    |          |             |                  |
|-------------|-----------|----|----------|-------------|------------------|
|             | Statistic | df | <i>p</i> | Effect size | BF <sub>10</sub> |
| Pre w1      | -1.754    | 15 | 0.100    | -0.439      | 0.891            |
| Sleep w1    | 0.010     | 15 | 0.992    | 0.003       | 0.255            |
| Post w1     | 0.331     | 15 | 0.745    | 0.083       | 0.268            |
| Pre w2      | -0.319    | 15 | 0.754    | -0.080      | 0.267            |
| Sleep w2    | 1.801     | 15 | 0.092    | 0.450       | 0.947            |
| Post w2     | 63.00     | 15 | 0.821    | -0.074      | 0.256            |
| Pre w3      | -0.872    | 15 | 0.397    | -0.218      | 0.356            |
| Sleep w3    | 0.394     | 15 | 0.699    | 0.099       | 0.274            |
| Post w3     | 1.299     | 15 | 0.214    | 0.325       | 0.521            |

### Supplementary Materials S3: within hemispheres connectivity

Table S9 RM-Anova results for within right hemisphere (RHem) connectivity, PLV (left) and wPLI (right) for each window of interest (w1 to w3).

| within RHem | PLV                                                                    |                                                                        |                                                                        | wPLI                                                                                  |                                                                        |                                                                        |
|-------------|------------------------------------------------------------------------|------------------------------------------------------------------------|------------------------------------------------------------------------|---------------------------------------------------------------------------------------|------------------------------------------------------------------------|------------------------------------------------------------------------|
|             | w1                                                                     | w2                                                                     | w3                                                                     | w1                                                                                    | w2                                                                     | w3                                                                     |
| Session     | F=0.46, p=0.63<br>BF <sub>10</sub> =0.198<br>BF <sub>incl</sub> =0.137 | F=1.37, p=0.26<br>BF <sub>10</sub> =0.302<br>BF <sub>incl</sub> =0.214 | F=0.18, p=0.84<br>BF <sub>10</sub> =0.109<br>BF <sub>incl</sub> =0.076 | F=3.15, <b>p=0.05</b><br>BF <sub>10</sub> = <b>1.427</b><br>BF <sub>incl</sub> =1.044 | F=1.49, p=0.23<br>BF <sub>10</sub> =0.338<br>BF <sub>incl</sub> =0.249 | F=0.47, p=0.62<br>BF <sub>10</sub> =0.136<br>BF <sub>incl</sub> =0.919 |

|              |                                                                         |                                                                        |                                                                        |                                                                        |                                                                                        |                                                                                        |
|--------------|-------------------------------------------------------------------------|------------------------------------------------------------------------|------------------------------------------------------------------------|------------------------------------------------------------------------|----------------------------------------------------------------------------------------|----------------------------------------------------------------------------------------|
| Hand         | F=0.002, p=0.96<br>BF <sub>10</sub> =0.282<br>BF <sub>incl</sub> =0.193 | F=0.46, p=0.50<br>BF <sub>10</sub> =0.337<br>BF <sub>incl</sub> =0.238 | F=0.25, p=0.62<br>BF <sub>10</sub> =0.328<br>BF <sub>incl</sub> =0.223 | F=0.96, p=0.33<br>BF <sub>10</sub> =0.385<br>BF <sub>incl</sub> =0.310 | F=4.68, <b>p=0.039</b><br>BF <sub>10</sub> = <b>1.600</b><br>BF <sub>incl</sub> =1.112 | F=0.659, p=0.42<br>BF <sub>10</sub> =0.340<br>BF <sub>incl</sub> =1.205                |
| Session*Hand | F=0.034, p=0.96<br>BF <sub>10</sub> =0.056<br>BF <sub>incl</sub> =0.023 | F=0.64, p=0.53<br>BF <sub>10</sub> =0.102<br>BF <sub>incl</sub> =0.60  | F=0.25, p=0.77<br>BF <sub>10</sub> =0.036<br>BF <sub>incl</sub> =0.019 | F=0.92, p=0.40<br>BF <sub>10</sub> =0.564<br>BF <sub>incl</sub> =0.211 | F=0.15, p=0.86<br>BF <sub>10</sub> =0.537<br>BF <sub>incl</sub> =0.109                 | F=6.90, <b>p=0.002</b><br>BF <sub>10</sub> = <b>2.667</b><br>BF <sub>incl</sub> =4.384 |

Table S10 RM-Anova results for within left hemisphere (LHem) connectivity, PLV (left) and wPLI (right) for each window of interest (w1 to w3).

| within LHem  | PLV                                                                                   |                                                                                       |                                                                                        | wPLI                                                                           |                                                                        |                                                                                |
|--------------|---------------------------------------------------------------------------------------|---------------------------------------------------------------------------------------|----------------------------------------------------------------------------------------|--------------------------------------------------------------------------------|------------------------------------------------------------------------|--------------------------------------------------------------------------------|
|              | w1                                                                                    | w2                                                                                    | w3                                                                                     | w1                                                                             | w2                                                                     | w3                                                                             |
| Session      | F=3.26, <b>p=0.057</b><br>BF <sub>10</sub> = <b>1.623</b><br>BF <sub>incl</sub> =1.18 | F=3.43, <b>p=0.039</b><br>BF <sub>10</sub> = <b>2.306</b><br>BF <sub>incl</sub> =1.60 | F=2.73, <b>p=0.073</b><br>BF <sub>10</sub> = <b>1.292</b><br>BF <sub>incl</sub> =0.896 | F=0.22, p=0.80<br>BF <sub>10</sub> =0.136<br>BF <sub>incl</sub> =0.094         | F=0.35, p=0.71<br>BF <sub>10</sub> =0.131<br>BF <sub>incl</sub> =0.126 | F=0.34, p=0.71<br>BF <sub>10</sub> =0.128<br>BF <sub>incl</sub> =0.134         |
| Hand         | F=0.001, p=0.97<br>BF <sub>10</sub> =0.260<br>BF <sub>incl</sub> =0.191               | F=0.57, p=0.45<br>BF <sub>10</sub> =0.313<br>BF <sub>incl</sub> =0.233                | F=0.21, p=0.64<br>BF <sub>10</sub> =0.272<br>BF <sub>incl</sub> =0.201                 | F=4.27, <b>p=0.047</b><br>BF <sub>10</sub> =0.852<br>BF <sub>incl</sub> =0.574 | F=0.49, p=0.49<br>BF <sub>10</sub> =0.295<br>BF <sub>incl</sub> =0.241 | F=0.31, p=0.58<br>BF <sub>10</sub> =0.293<br>BF <sub>incl</sub> =0.251         |
| Session*Hand | F=0.012, p=0.97<br>BF <sub>10</sub> =0.417<br>BF <sub>incl</sub> =0.088               | F=0.16, p=0.85<br>BF <sub>10</sub> =0.710<br>BF <sub>incl</sub> =0.120                | F=0.05, p=0.95<br>BF <sub>10</sub> =0.358<br>BF <sub>incl</sub> =0.081                 | F=0.56, p=0.58<br>BF <sub>10</sub> =0.101<br>BF <sub>incl</sub> =0.047         | F=2.06, p=0.14<br>BF <sub>10</sub> =0.038<br>BF <sub>incl</sub> =0.206 | F=3.38, <b>p=0.041</b><br>BF <sub>10</sub> =0.096<br>BF <sub>incl</sub> =0.262 |

Table S11. Post-hoc analysis for Session (Pre, Sleep, Post) for within right hemisphere (RHem). Statistically significant values are shadowed in grey with the respective p values in bold, p-values less than 0.10 are highlighted in bold. C=Cohen's d for measures of effect size.

| within RHem | PLV                                                |                                                       |                                                    | wPLI                                                  |                                                       |                                                  |
|-------------|----------------------------------------------------|-------------------------------------------------------|----------------------------------------------------|-------------------------------------------------------|-------------------------------------------------------|--------------------------------------------------|
|             | w1                                                 | w2                                                    | w3                                                 | w1                                                    | w2                                                    | w3                                               |
| Pre-Sleep   | t=-1.05, p=1<br>C=-0.01<br>BF <sub>10</sub> =0.361 | t=1.34, p=0.57<br>C=0.24<br>BF <sub>10</sub> =0.427   | t=0.53, p=1<br>C=0.09<br>BF <sub>10</sub> =0.216   | t=2.92, p=0.10<br>C=0.39<br>BF <sub>10</sub> =1.518   | t=1.54, p=0.40<br>C=0.27<br>BF <sub>10</sub> =0.545   | t=0.67, p=1<br>C=0.11<br>BF <sub>10</sub> =0.229 |
| Pre-Post    | t=0.92, p=1<br>C=0.16<br>BF <sub>10</sub> =0.275   | t=1.34, p=0.57<br>C=0.24<br>BF <sub>10</sub> =0.427   | t=0.51, p=1<br>C=0.07<br>BF <sub>10</sub> =0.205   | t=0.85, p=0.40<br>C=0.15<br>BF <sub>10</sub> =0.263   | t=1.28, p=0.42<br>C=0.22<br>BF <sub>10</sub> =0.400   | t=0.74, p=1<br>C=0.13<br>BF <sub>10</sub> =0.244 |
| Sleep-Post  | t=0.87, p=1<br>C=0.15<br>BF <sub>10</sub> =0.203   | t=-0.08, p=0.94<br>C=-0.01<br>BF <sub>10</sub> =0.189 | t=-0.15, p=1<br>C=-0.03<br>BF <sub>10</sub> =0.191 | t=-1.85, p=0.15<br>C=-0.33<br>BF <sub>10</sub> =0.826 | t=-0.25, p=0.80<br>C=-0.04<br>BF <sub>10</sub> =0.194 | t=0.24, p=1<br>C=0.04<br>BF <sub>10</sub> =0.194 |

Table S12. Post-hoc analysis for Session (Pre, Sleep, Post) for within left hemisphere (LHem). Statistically significant values are shadowed in grey with the respective p values in bold, p-values less than 0.10 are highlighted in bold. C=Cohen's d for measures of effect size.

| within LHem | PLV | wPLI |
|-------------|-----|------|
|-------------|-----|------|

|            | <i>w1</i>                                                         | <i>w2</i>                                                         | <i>w3</i>                                                         | <i>w1</i>                                          | <i>w2</i>                                        | <i>w3</i>                                          |
|------------|-------------------------------------------------------------------|-------------------------------------------------------------------|-------------------------------------------------------------------|----------------------------------------------------|--------------------------------------------------|----------------------------------------------------|
| Pre –Sleep | t=-1.09, p=0.91<br>C=-0.019<br>BF <sub>10</sub> =0.192            | t=-0.31, p=0.82<br>C=0.04<br>BF <sub>10</sub> =0.194              | t=-0.04, p=0.97<br>C=-0.01<br>BF <sub>10</sub> =0.189             | t=-0.23, p=1<br>C=-0.04<br>BF <sub>10</sub> =0.194 | t=0.71, p=1<br>C=0.12<br>BF <sub>10</sub> =0.238 | t=-0.57, p=1<br>C=-0.10<br>BF <sub>10</sub> =0.220 |
| Pres-Post  | t=2.04, p=0.099<br>C=0.361<br>BF <sub>10</sub> =0.884             | t=1.97, p=0.12<br>C=0.35<br>BF <sub>10</sub> =1.040               | t=0.33, p=0.15<br>C=0.33<br>BF <sub>10</sub> =0.853               | t=-0.61, p=1<br>C=-0.11<br>BF <sub>10</sub> =0.225 | t=0.73, p=1<br>C=0.13<br>BF <sub>10</sub> =0.241 | t=-0.75, p=1<br>C=-0.13<br>BF <sub>10</sub> =0.244 |
| Sleep-Post | t=3.20, <b>p=0.009</b><br>C=0.567<br><b>BF<sub>10</sub>=9.687</b> | t=3.72, <b>p=0.002</b><br>C=0.66<br><b>BF<sub>10</sub>=40.595</b> | t=2.79, <b>p=0.027</b><br>C=0.493<br><b>BF<sub>10</sub>=4.853</b> | t=-0.42, p=1<br>C=-0.07<br>BF <sub>10</sub> =0.205 | t=0.01, p=1<br>C=0.02<br>BF <sub>10</sub> =0.189 | t=-0.20, p=1<br>C=-0.03<br>BF <sub>10</sub> =0.192 |

*Table S13. Statistical results from paired t-test comparing R vs. L hands for each window and session for within right hemisphere connectivity. Wilcoxon signed-rank test is used when normality (Shapiro-Wilk test) assumption is violated. In this case, effect size is given by the matched rank bi-serial correlation. Otherwise, paired student t-test and Cohen’s d values are stated. All tests were one-tailed.*

| R vs. L hand |    | within RHem |              |             |                  |           |              |             |                  |
|--------------|----|-------------|--------------|-------------|------------------|-----------|--------------|-------------|------------------|
|              |    | PLV         |              |             |                  | wPLI      |              |             |                  |
|              |    | Statistic   | <i>p</i>     | Effect size | BF <sub>10</sub> | Statistic | <i>p</i>     | Effect size | BF <sub>10</sub> |
| Pre          | w1 | -1.18       | 0.128        | -0.29       | 0.12             | 0.365     | 0.640        | 0.091       | 0.199            |
|              | w2 | 1.86        | 0.959        | 0.46        | 0.10             | -1.85     | <b>0.042</b> | -0.46       | <b>2.938</b>     |
|              | w3 | 95.0        | 0.920        | 0.39        | 0.21             | 2.65      | 0.991        | 0.66        | 0.087            |
| Sleep        | w1 | 0.80        | 0.784        | 0.20        | 0.36             | -1.603    | <b>0.042</b> | -0.401      | <b>1.360</b>     |
|              | w2 | 33.0        | <b>0.037</b> | -0.51       | <b>2.79</b>      | -1.46     | <b>0.082</b> | -0.36       | <b>1.130</b>     |
|              | w3 | 34.0        | <b>0.042</b> | -0.50       | <b>2.58</b>      | -1.55     | <b>0.070</b> | -0.38       | <b>1.276</b>     |
| Post         | w1 | -0.60       | 0.277        | -0.15       | 0.51             | -0.817    | 0.213        | -0.20       | 0.529            |
|              | w2 | 29.0        | <b>0.022</b> | -0.57       | <b>3.75</b>      | -1.53     | <b>0.072</b> | -0.38       | <b>1.247</b>     |
|              | w3 | 61.0        | 0.372        | -0.10       | 0.53             | -2.49     | <b>0.012</b> | -0.62       | <b>5.115</b>     |



Table S14. Statistical results from paired t-test comparing R vs. L hands for each window and session for within left hemisphere connectivity. Wilcoxon signed-rank test is used when normality (Shapiro-Wilk test) assumption is violated. In this case, effect size is given by the matched rank bi-serial correlation. Otherwise, paired student t-test and Cohen's d values are stated. All tests were one-tailed.

| R vs. L hand |    | within LHem |              |             |                  |           |              |             |                  |
|--------------|----|-------------|--------------|-------------|------------------|-----------|--------------|-------------|------------------|
|              |    | PLV         |              |             |                  | wPLI      |              |             |                  |
|              |    | Statistic   | p            | Effect size | BF <sub>10</sub> | Statistic | p            | Effect size | BF <sub>10</sub> |
| Pre          | w1 | -0.28       | 0.609        | -0.07       | 0.26             | 0.62      | 0.270        | 0.15        | 0.437            |
|              | w2 | 79.0        | 0.298        | 0.16        | 0.23             | -2.28     | 0.981        | -0.57       | 0.094            |
|              | w3 | 0.31        | 0.311        | 0.12        | 0.38             | -1.49     | 0.923        | -0.37       | 0.117            |
| Sleep        | w1 | 1.97        | <b>0.063</b> | 0.49        | 1.03             | 0.69      | 0.250        | 0.17        | 0.465            |
|              | w2 | 116.0       | <b>0.005</b> | 0.70        | <b>2.38</b>      | 1.84      | <b>0.042</b> | 0.46        | <b>1.912</b>     |
|              | w3 | 86.0        | 0.188        | 0.26        | 1.09             | 1.76      | <b>0.049</b> | 0.44        | <b>1.703</b>     |
| Post         | w1 | -0.77       | 0.774        | -0.19       | 0.12             | 2.05      | <b>0.029</b> | 0.51        | <b>2.602</b>     |
|              | w2 | 85.0        | 0.202        | 0.25        | 0.11             | 0.77      | 0.227        | 0.19        | 0.053            |
|              | w3 | 104.0       | <b>0.033</b> | 0.52        | <b>2.30</b>      | 1.50      | <b>0.076</b> | 0.37        | <b>1.195</b>     |

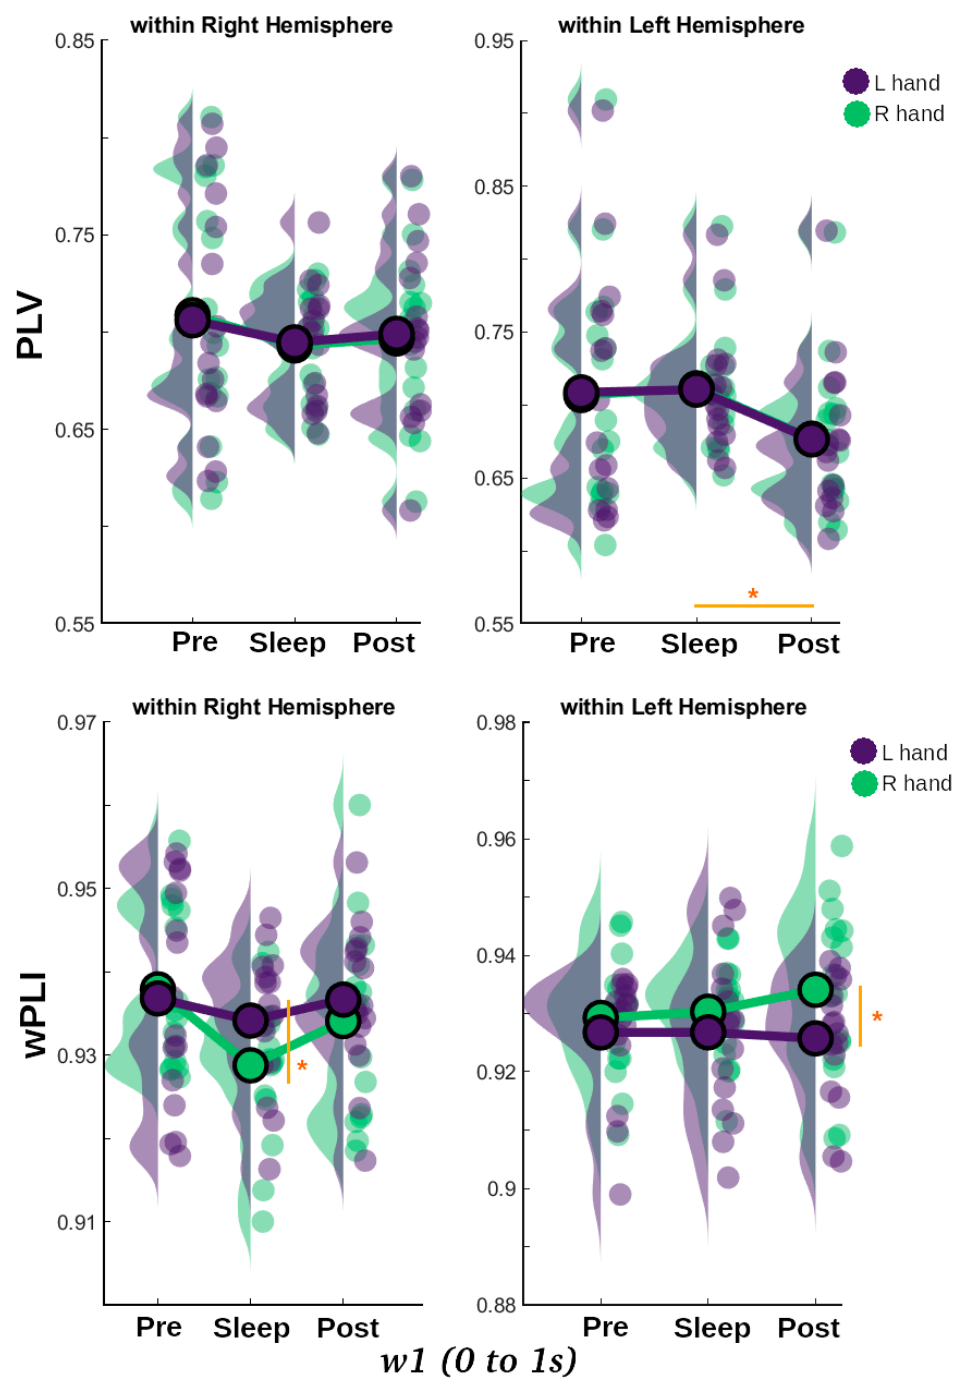

Figure S3. Repeated Measures Anova for PLV (upper row) and wPLI (bottom row) for within right hemisphere (left column) and within left hemisphere (right column) and w1. R hand is shown in green and L hand is represented in purple. Statistically significant results are highlighted in orange (\*  $p < 0.05$ , \*\*  $p < 0.01$ , °  $p < 0.09$ ).

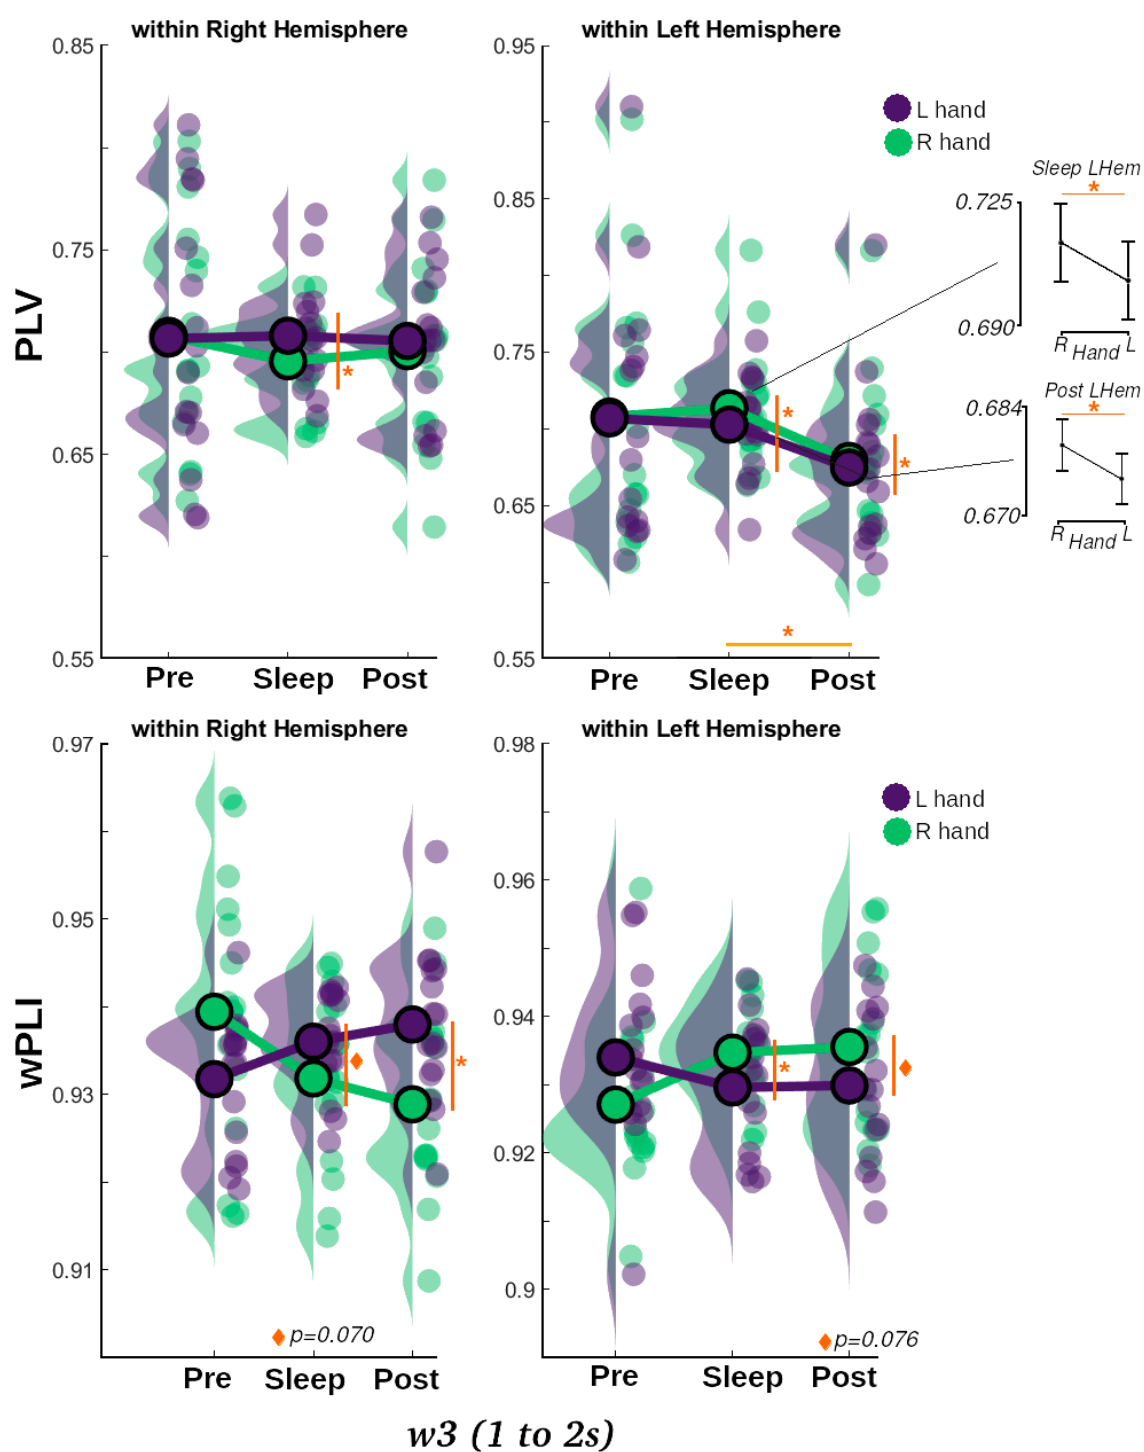

Figure S4. Repeated Measures Anova for PLV (upper row) and wPLI (bottom row) for within right hemisphere (left column) and within left hemisphere (right column) and w3. R hand is shown in green and L hand is represented in purple. Statistically significant results are highlighted in orange (\*  $p<0.05$ , \*\*  $p<0.01$ , ◊  $p<0.09$ ). Top-left corner graph have two zoomed

### Supplementary Materials S4: correlations

For each connectivity we calculated within right hemisphere (left column) and within left hemisphere (right column) values, that are also separated by R and L (the former in a yellowish background) hands. Correlation values are expressed by its value *Rho* and the bootstrapped (n=50000) corrected *p*-value. For clarity only correlations under 0.150 are depicted in the tables. Statistically significant correlations are highlighted in bold and darker background.

Table S15 Correlations between within hemispheres PLV-connectivity and behavioural measures.

| PLV                     |          |                         |          |        |          |                        |          |        |          |
|-------------------------|----------|-------------------------|----------|--------|----------|------------------------|----------|--------|----------|
| Behaviour               | Session  | Within Right Hemisphere |          |        |          | Within Left Hemisphere |          |        |          |
|                         |          | R hand                  |          | L hand |          | R hand                 |          | L hand |          |
|                         |          | Rho                     | <i>p</i> | Rho    | <i>p</i> | Rho                    | <i>p</i> | Rho    | <i>p</i> |
| Reactivated blocks      |          |                         |          |        |          |                        |          |        |          |
| sss pre                 |          |                         |          |        |          |                        |          |        |          |
| sss post early          | Sleep w1 |                         |          | 0.54   | 0.116    |                        |          |        |          |
|                         | Sleep w2 |                         |          | 0.63   | 0.037    |                        |          |        |          |
| sss post early          |          |                         |          |        |          |                        |          |        |          |
| ssi early               | Sleep w1 |                         |          |        |          |                        |          |        |          |
|                         | Sleep w2 |                         |          | 0.63   | 0.057    |                        |          |        |          |
|                         | Post w1  | -0.55                   | 0.109    |        |          |                        |          |        |          |
|                         | Post w2  |                         |          | -0.55  | 0.125    |                        |          |        |          |
|                         | Post w3  |                         |          | -0.53  | 0.148    |                        |          |        |          |
| ssi late                |          |                         |          |        |          |                        |          |        |          |
| Non- Reactivated blocks |          |                         |          |        |          |                        |          |        |          |
| sss pre                 |          |                         |          |        |          |                        |          |        |          |
| sss post early          | Sleep w2 |                         |          | 0.50   | 0.143    |                        |          |        |          |
| sss post late           |          |                         |          |        |          |                        |          |        |          |
| ssi early               | Post w2  |                         |          | -0.55  | 0.107    |                        |          |        |          |
|                         | Post w1  |                         |          | -0.48  | 0.146    |                        |          |        |          |
| ssi late                | Pre w1   |                         |          | -0.55  | 0.108    |                        |          |        |          |
|                         | Pre w3   |                         |          | -0.55  | 0.106    |                        |          |        |          |
|                         | Sleep w2 | -0.50                   | 0.12     |        |          |                        |          | 0.58   | 0.066    |

Table S16 Correlations between within hemispheres wPLI-connectivity and behavioural measures.

| wPLI                   |          |                         |          |        |          |                        |          |        |          |
|------------------------|----------|-------------------------|----------|--------|----------|------------------------|----------|--------|----------|
| Behaviour              | Session  | Within Right Hemisphere |          |        |          | Within Left Hemisphere |          |        |          |
|                        |          | R hand                  |          | L hand |          | R hand                 |          | L hand |          |
|                        |          | Rho                     | <i>p</i> | Rho    | <i>p</i> | Rho                    | <i>p</i> | Rho    | <i>p</i> |
| Reactivated blocks     |          |                         |          |        |          |                        |          |        |          |
| sss pre                | Sleep w3 |                         |          | 0.47   | 0.159    | -0.53                  | 0.088    |        |          |
|                        | Post w3  |                         |          | 0.47   | 0.159    |                        |          | 0.47   | 0.129    |
| sss post early         |          |                         |          |        |          |                        |          |        |          |
| sss post late          | Sleep w3 |                         |          |        |          | -0.50                  | 0.13     |        |          |
| ssi early              | Sleep w2 |                         |          |        |          |                        |          | -0.59  | 0.061    |
|                        | Sleep w3 | 0.49                    | 0.144    |        |          |                        |          |        |          |
| ssi late               | Sleep w3 |                         |          |        |          | -0.50                  | 0.150    |        |          |
| Non-Reactivated blocks |          |                         |          |        |          |                        |          |        |          |
| sss pre                | Sleep w1 |                         |          |        |          | -0.66                  | 0.053    |        |          |
|                        | Post w2  | 0.54                    | 0.099    |        |          |                        |          |        |          |
| sss post early         | Sleep w2 |                         |          |        |          | -0.56                  | 0.102    |        |          |
|                        | Sleep w3 |                         |          | 0.50   | 0.130    |                        |          |        |          |
| sss post late          | Sleep w2 |                         |          |        |          | -0.54                  | 0.114    |        |          |
| ssi early              | Sleep w2 |                         |          |        |          | -0.51                  | 0.136    |        |          |
| ssi late               |          |                         |          |        |          |                        |          |        |          |

### Supplementary Materials S5: Power analysis

All spectral analysis was performed in fieldtrip for each participant and window of interest without separate between L and R hand conditions. Power spectrum was calculated in the theta band (3-8Hz) using 3 cycles wavelets. The z-normalised values were then averaged within that frequency band and compared between sessions using cluster permutations Fieldtrip function (permutations=10000, alpha=0.05). There were not significant differences among sessions for any of the cases, with the lowest p-value (p=0.099) between Pre and Seep for w1 in the occipital channel 02.
